# Supplementary material for: A long life sodium–selenium cathode by encapsulating selenium into N-doped interconnected carbon aerogels
Source: Royal Society of Chemistry journal article supplement (doi:10.1039/c9nr00701f), 2019-01-01
Supplement: c9nr00701f1.pdf [file c9nr00701f1.pdf]

## Support information

Yurui Deng<sup>a</sup>, Lunlun Gong<sup>\*a</sup>, Yuelei Pan<sup>ab</sup>, Xudong Cheng<sup>a</sup>, and Heping Zhang<sup>\*a</sup>

\* Corresponding authors

<sup>a</sup> State Key Laboratory of Fire Science, University of Science and Technology of China, Hefei, P. R. China

<sup>b</sup> Energy Storage and Distributed Resources Division, Lawrence Berkeley National Laboratory, Berkeley, CA, 94720, USA

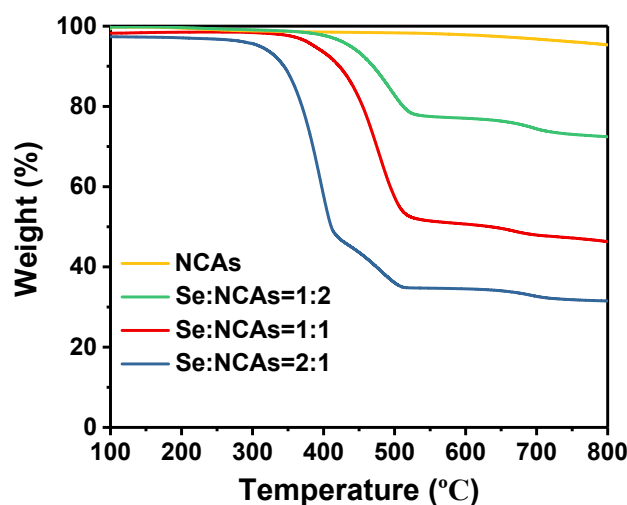

**Fig. S1** TG profiles of the obtained composites with various ratios of Se versus NCAs. The content of Se distributed in the porous carbon polyhedrons was determined to be 28.55%, 52.23%, and 68.49%, respectively.

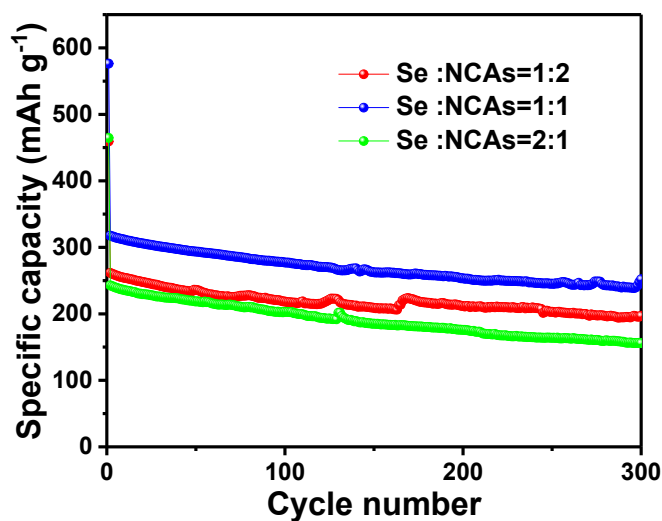

**Fig. S2** Cyclic performances of the composites with various ratios of Se versus NCAs at a current density of  $0.5 \text{ A g}^{-1}$  (the specific capacity is based on the Se @ NCAs composite)

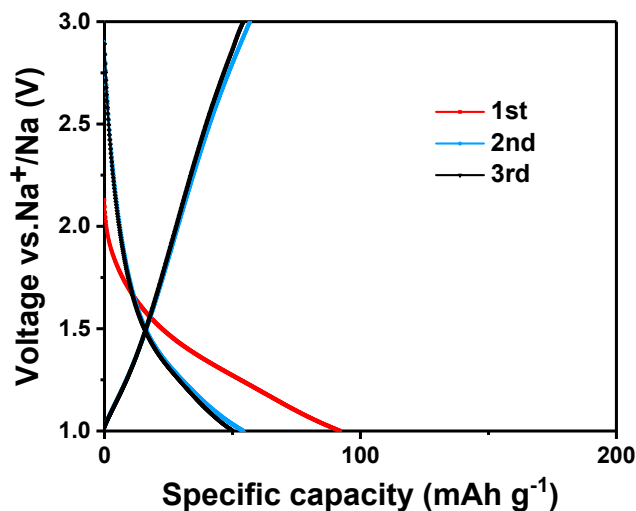

**Fig. S3** Galvanostatic charge/discharge profiles of the NCAs at a current density of  $0.1 \text{ A g}^{-1}$ .

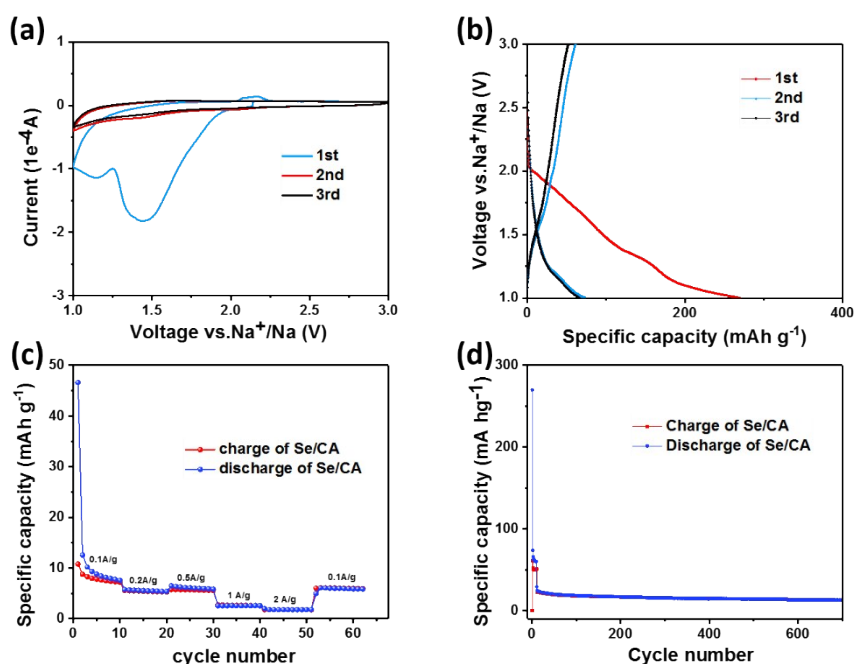

**Fig. S4** (a) Cyclic voltammograms of the Se/CAs electrode at a scan rate of  $0.1 \text{ mV s}^{-1}$  in the voltage window from 1 V to 3 V versus  $\text{Na}^+/\text{Na}$ . (b) Galvanostatic charge/discharge profiles of the Se/CAs electrode at a current density of  $0.1 \text{ A g}^{-1}$  between 1 V and 3 V versus  $\text{Na}^+/\text{Na}$ . (c) Rate capability of the Se/CAs composite at various current densities. (e) A long-term cycling performance of the Se/CAs composite at a current density of  $0.5 \text{ A g}^{-1}$ .

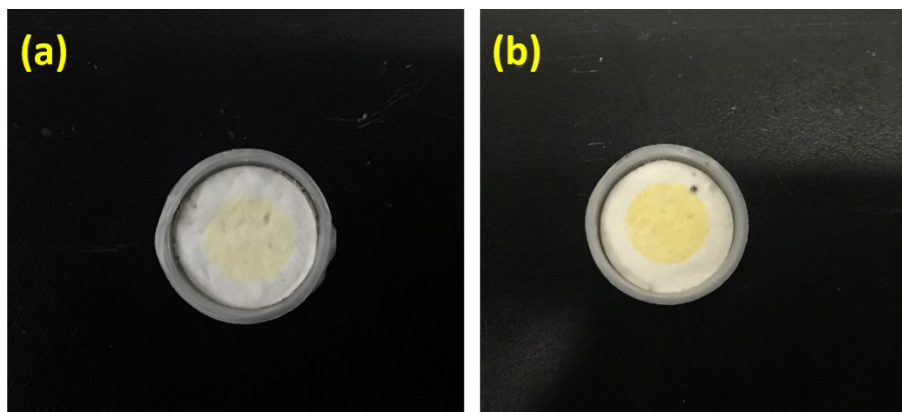

Fig. S5 The color change of electrodes/electrolytes in the Se @ NCAs (a) and Se/CAs (b) cells after cycling.

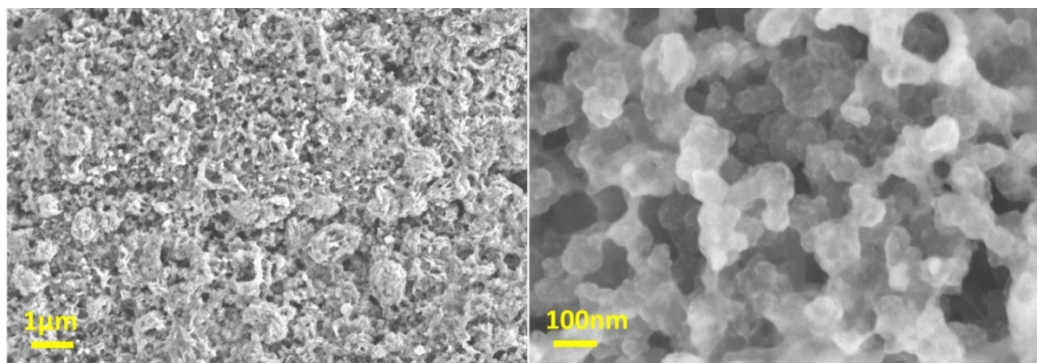

Fig. S6 The SEM image of the cycled Se@NCAs.

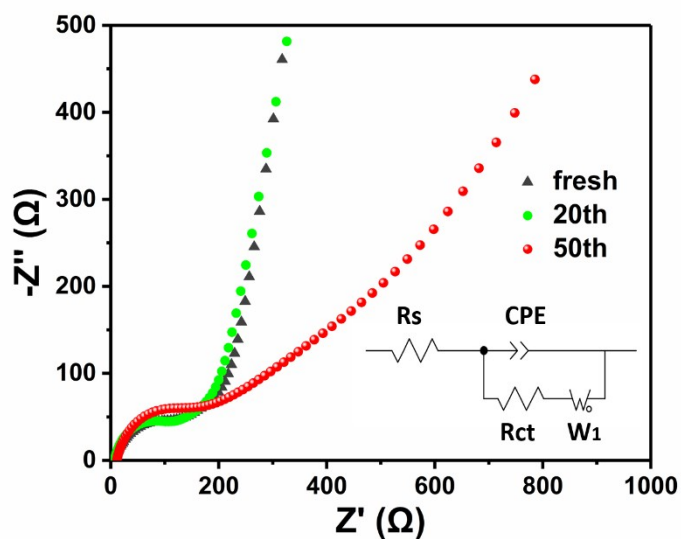

Fig. S7 Nyquist plots of the fresh and cycled Se @ MCNFs cells; the inset exhibits the equivalent circuit to fit the plots.

Table S1 The changes on electrode charge transfer resistance ( $R_{ct}$ ) and ohmic resistance ( $R_s$ ) of Se@NCAs cathodes upon cycling

| Cycle number          | Fresh cell | 10 <sup>th</sup> cycle | 20 <sup>th</sup> cycle |
|-----------------------|------------|------------------------|------------------------|
| $R_s$ ( $\Omega$ )    | 6.14       | 6.941                  | 11.21                  |
| $R_{ct}$ ( $\Omega$ ) | 120        | 98.71                  | 96.85                  |

Table S2. The long cycling performance comparison for the published Se-based cathodes for Na-Se batteries.

| Materials    | Current density<br>(A g <sup>-1</sup> ) | Reversible capacity<br>(mA h g <sup>-1</sup> ) | references |
|--------------|-----------------------------------------|------------------------------------------------|------------|
| C/Se         | 0.1                                     | 258 at 50 <sup>th</sup> cycle                  | 1          |
| Se/C         | 0.1695                                  | 340 at 380 <sup>th</sup> cycle                 | 2          |
| Se/(CNT@MPC) | 0.675                                   | 440 at 100 <sup>th</sup> cycle                 | 3          |
| Se-CCN       | 0.135                                   | 514 at 500 <sup>th</sup> cycle                 | 4          |
| Se@CNFs-CNT  | 0.5                                     | 410 at 240 <sup>th</sup> cycle                 | 5          |
| CPAN/Se      | 0.2025                                  | 410 at 300 <sup>th</sup> cycle                 | 6          |
| Se@MCNFs     | 0.5                                     | 430 at 300 <sup>th</sup> cycle                 | 7          |
| Se@NCAs      | 0.5                                     | 407 at 800 <sup>th</sup> cycle                 | This work  |

## References

1. C. Luo, J. J. Wang, L. M. Suo, J. F. Mao, X. L. Fan and C. S. Wang, *Journal of Materials Chemistry A*, 2015, **3**, 555-561.
2. C. Luo, Y. H. Xu, Y. J. Zhu, Y. H. Liu, S. Y. Zheng, Y. Liu, A. Langrock and C. S. Wang, *Acs Nano*, 2013, **7**, 8003-8010.
3. S. Xin, L. Yu, Y. You, H. P. Cong, Y. X. Yin, X. L. Du, Y. G. Guo, S. H. Yu, Y. Cui and J. B. Goodenough, *Nano Lett*, 2016, **16**, 4560-4568.
4. J. Ding, H. Zhou, H. L. Zhang, T. Stephenson, Z. Li, D. Karpuzov and D. Mitlin, *Energ Environ Sci*, 2017, **10**, 153-165.
5. L. C. Zeng, X. Wei, J. Q. Wang, Y. Jiang, W. H. Li and Y. Yu, *Journal of Power Sources*, 2015, **281**, 461-469.
6. H. Q. Wang, S. Li, Z. X. Chen, H. K. Liu and Z. P. Guo, *Rsc Adv*, 2014, **4**, 61673-61678.
7. B. Yuan, X. Sun, L. Zeng, Y. Yu and Q. Wang, *Small*, 2018, **14**, 1703252.
